# Supplementary material for: Efficacy and safety of durvalumab + chemotherapy vs. atezolizumab + chemotherapy in the treatment of small‑cell lung cancer: a retrospective comparative cohort study
Source: PubMed Central journal article supplement — J Thorac Dis. 2023 Jun 30;15(6):3339–49. doi: 10.21037/jtd-23-588 (PMC10323594; doi:10.21037/jtd-23-588), 2023-06-30
Supplement: jtd-15-06-3339-dss.pdf [file jtd-15-06-3339-dss.pdf]

## Data Sharing Statement

|                     |                                                                                                                                                    |                                                                                                                                                  |
|---------------------|----------------------------------------------------------------------------------------------------------------------------------------------------|--------------------------------------------------------------------------------------------------------------------------------------------------|
| <b>Article Info</b> | <a href="https://dx.doi.org/10.21037/jtd-23-588">https://dx.doi.org/10.21037/jtd-23-588</a>                                                        |                                                                                                                                                  |
| <b>Item</b>         | <b>Question</b>                                                                                                                                    | <b>Authors' Response<br/>(place "-" if not applicable)</b>                                                                                       |
| 1                   | Would you like to share data collected for your study to others?                                                                                   | Yes.                                                                                                                                             |
| 2                   | If not, would you like to share the reason for your decision?                                                                                      | -                                                                                                                                                |
| 3                   | What data in particular will be shared?                                                                                                            | The survival data of durvalumab and atezolizumab in the context of first-line treatment of SCLC can be particularly shared.                      |
| 4                   | Any other documents will be share? Such as study protocol, statistical analysis plan, informed consent form, clinical study report, analytic code. | Statistical analysis plan and clinical study report will also be shared if requested.                                                            |
| 5                   | When will data availability begin?                                                                                                                 | From the publication date.                                                                                                                       |
| 6                   | When will data availability end?                                                                                                                   | Two years within the publication date, since the technique or survival data may be updated over time.                                            |
| 7                   | To whom will you share the data?                                                                                                                   | Medical oncologists who are interested in studies of PD-L1 inhibitors.                                                                           |
| 8                   | For what type of analysis or purpose?                                                                                                              | For analysis to evaluate the efficacy and safety of PD-L1 inhibitors in SCLC patients.                                                           |
| 9                   | How or where can the data/documents be obtained?                                                                                                   | Emails could be sent to the address below to obtain the shared data:<br><a href="mailto:zhangzhihope2022@163.com">zhangzhihope2022@163.com</a> . |
| 10                  | Any other restrictions?                                                                                                                            | We may balance the potential benefits and risks for each request and then provide the data that could be shared.                                 |
